# Supplementary material for: High performing triple-conductive Pr2NiO4+δanode for proton-conducting steam solid oxide electrolysis cell
Source: Royal Society of Chemistry journal article supplement (doi:10.1039/c8ta04018d), 2018-01-01
Supplement: c8ta04018d1.pdf [file c8ta04018d1.pdf]

## High Performing Triple-Conductive $\text{Pr}_2\text{NiO}_{4+\delta}$ Anode for Proton-Conducting Steam Solid Oxide Electrolysis Cell

Wenyuan Li<sup>a</sup>, Bo Guan<sup>a</sup>, Liang Ma<sup>b</sup>, Shanshan Hu<sup>a</sup>, Nan Zhang<sup>a</sup>, Xingbo Liu<sup>a,\*</sup>

<sup>a</sup>Mechanical & Aerospace Engineering Department, Benjamin M. Statler College of Engineering & Mineral Resources, West Virginia University, Morgantown, WV 26506, USA

<sup>b</sup>School of Materials Science and Engineering, Hebei University of Engineering, Handan, 056038, China

### Supporting materials

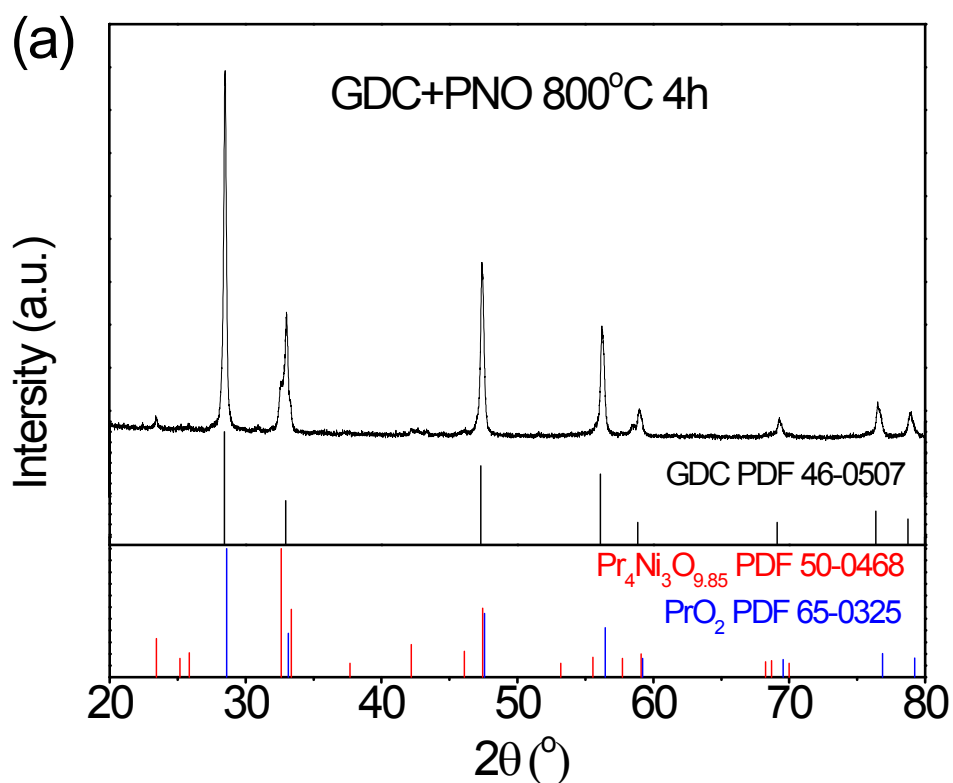

\* Corresponding author, E-mail address: Xingbo.liu@mail.wvu.edu

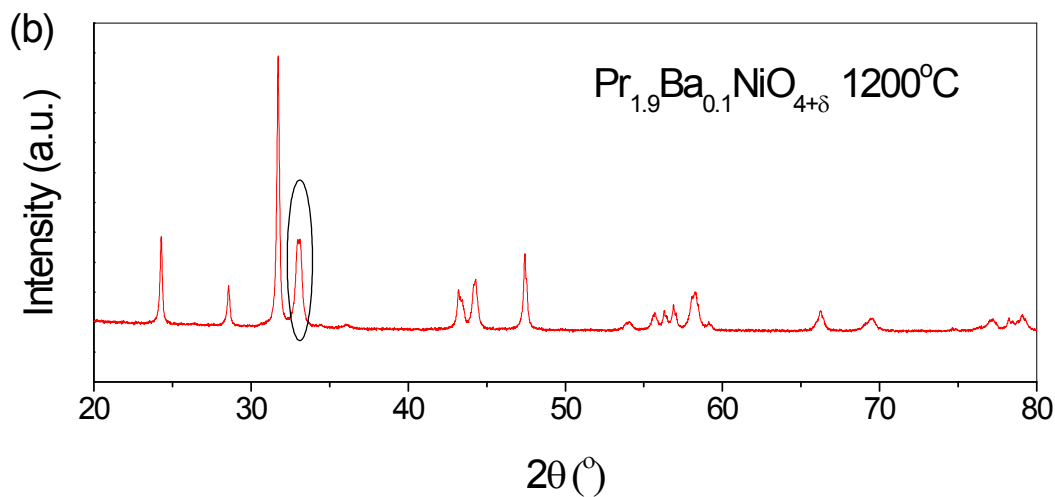

Fig. S1 (a) Interaction between PNO and GDC after heating at 800°C for 4h. Instead of symmetry change from orthorhombic to tetragonal, the  $\text{A}_{n+1}\text{B}_n\text{O}_{3n+1}$  RP phase evolves from low order to high order form, accompanied by release of simple praseodymium oxide, (b) orthorhombic to tetragonal symmetry transition when 5% Ba is doped at A site, note that the double peak at 33° in orthorhombic turns to single peak in the tetragonal symmetry.

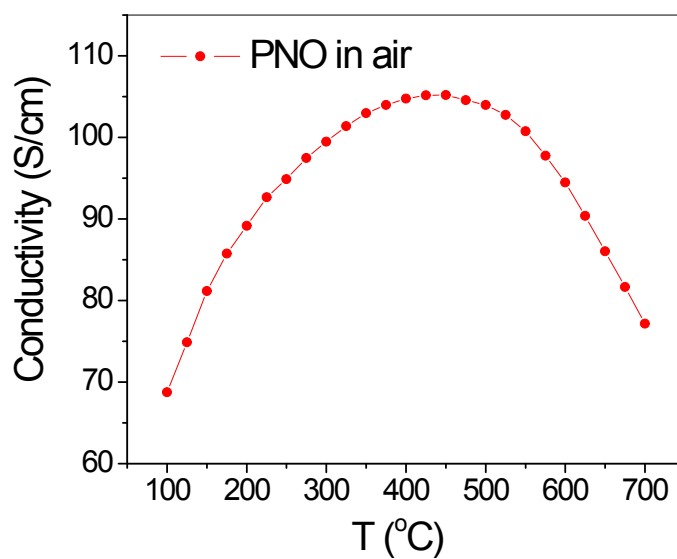

Fig. S2 electrical conductivity of PNO measured in dry air.

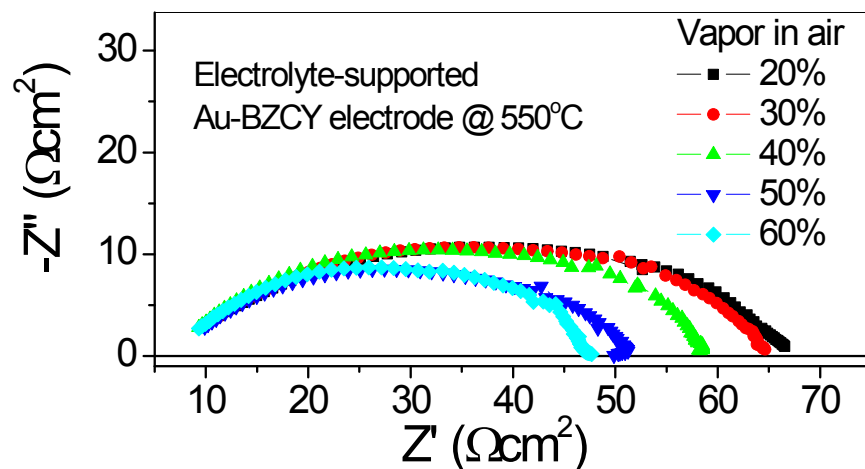

Fig. S3 Progressively decreasing polarization resistance of inert Au-BZCY electrode on BZCY electrolyte, measured in parallel experiment with PNO. No resistance saturation was observed.

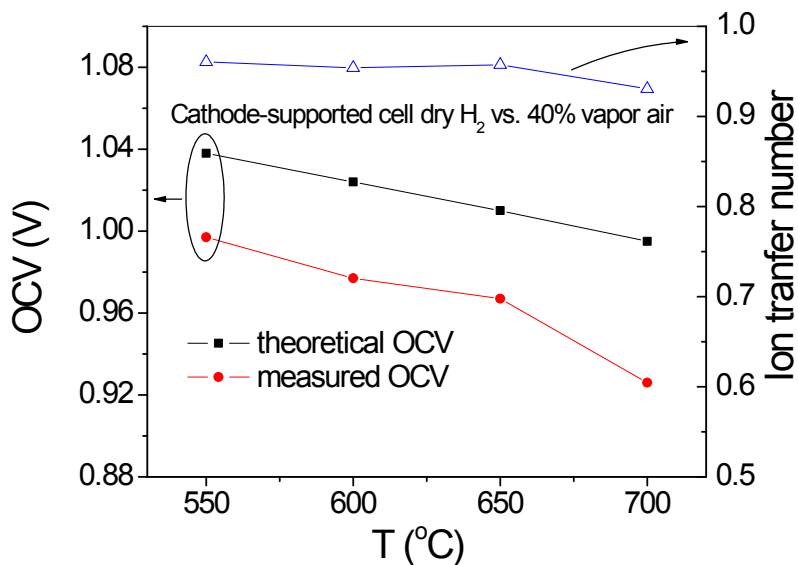

Fig. S4 Measured and calculated OCV of the cathode-supported full cell, the ion transport number is around 95%, proving negligible electronic and gas leakage through the thin BZCY electrolyte layer.

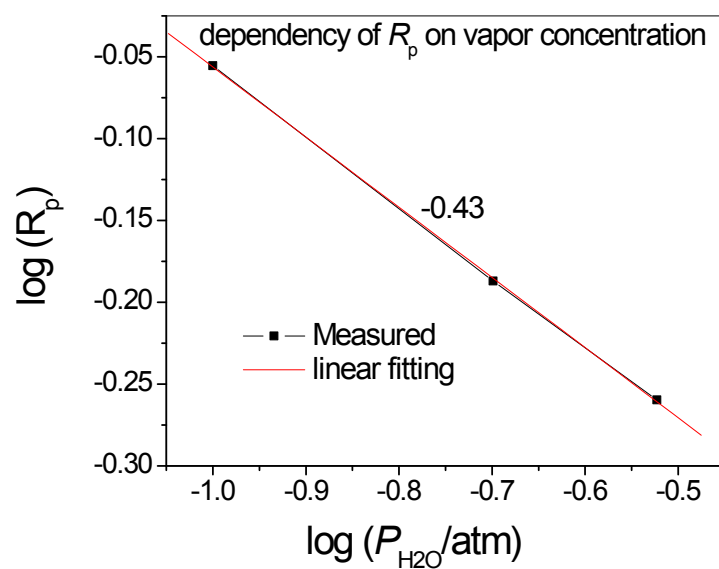

Fig. S5 Dependency of polarization resistance of PNO-BZCY anode on  $P_{\text{H}_2\text{O}}$  at 550°C measured at OCV.

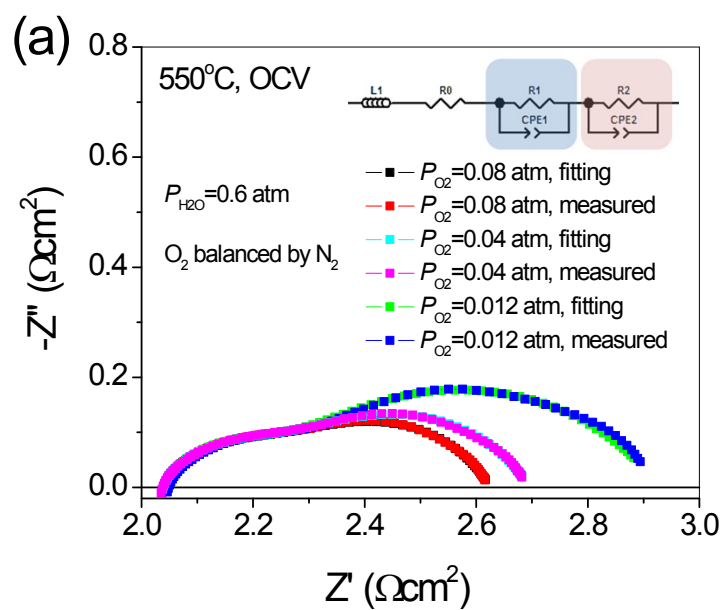

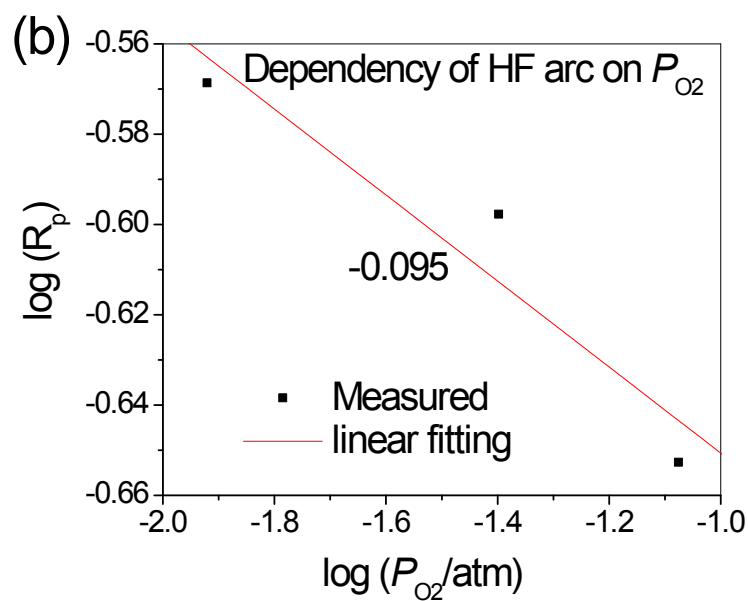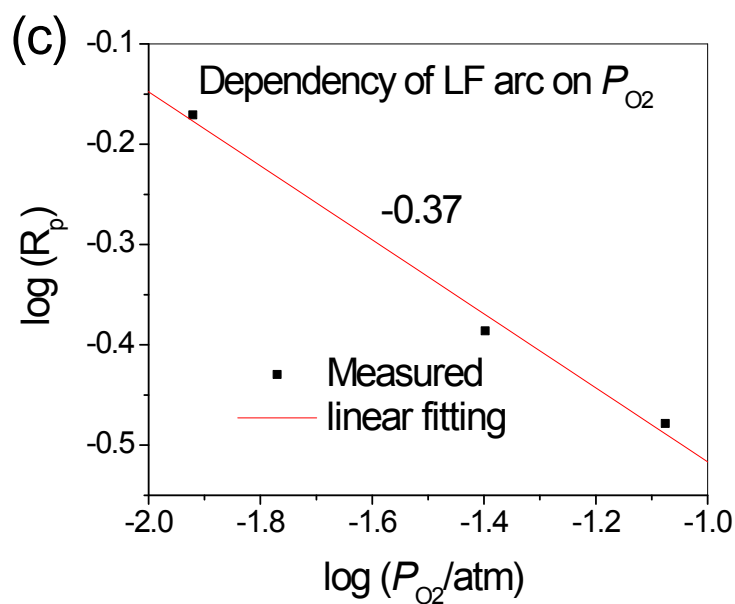

Fig. S6 (a) Measured and fitted EIS of PNO-BZCY anode in 60% vapor with varying  $P_{O_2}$  at 550°C under OCV, these spectra are fitted into a two-arc profile using the equivalent circuit in the inset; (b) reaction order of the fitted HF arc resistance on  $P_{O_2}$ ; (c) reaction order of the fitted LF arc resistance on  $P_{O_2}$
